# Supplementary material for: Synthesis and characterization of rGO decorated cubic ZnTiO3 rods for solar light-induced photodegradation of rhodamine B
Source: Royal Society of Chemistry journal article supplement (doi:10.1039/c8nj01971a), 2019-01-01
Supplement: c8nj01971a1.pdf [file c8nj01971a1.pdf]

## Synthesis and characterization of rGO decorated cubic ZnTiO<sub>3</sub> rods for solar light-induced photodegradation of rhodamine B

Junsheng Li<sup>1,2</sup>, Hongtao Cui<sup>3</sup>, Deying Mu<sup>1</sup>, Yuanlong Liu<sup>4</sup>, Tianyu Guan<sup>3</sup>, Zhi Xia<sup>1</sup>, Liming Jiang<sup>1</sup>, Jinlong Zuo<sup>1</sup>, Chong Tan<sup>3</sup>, Hong You<sup>2,\*</sup>

<sup>1</sup>School of Food Science and Engineering, Harbin University of Commerce, Harbin 150076, China. E-mail: shengjunli731@126.com

<sup>2</sup>State Key Laboratory of Urban Water Resource and Environment, Harbin Institute of Technology, Harbin 150090, China

<sup>3</sup>Research Center on Life Sciences and Environmental Sciences, Harbin University of Commerce, Harbin 150076, China.

<sup>4</sup>School of Chemistry and Chemical Engineering, Harbin Institute of Technology, Harbin 150001, China.

\*Corresponding author: HongYou

E-mail: [yuhongharbin@163.com](mailto:yuhongharbin@163.com)

### Supplementary Information

#### Experimental

##### 1. Synthesis of ZnTiO<sub>3</sub> Particles

The ZnTiO<sub>3</sub> particles were synthesized by using liquid precipitation method. At first, 1.5 g Zn(NO<sub>3</sub>)<sub>2</sub>·6H<sub>2</sub>O (analytical grade, TCI) and 1.7 g Ti(OC<sub>4</sub>H<sub>9</sub>)<sub>4</sub> (analytical grade, TCI) were dissolved in 100 mL glycol, respectively, both of which were mixed together under stirring. The mixed solutions and 25 wt% concentrated ammonia aqueous solution were dropwise added into a 200mL glycol under strongly stirring at 50 °C for 24 h and pH was maintained at a near-neutral during the precipitation process. The precipitated Zn(OH)<sub>2</sub>/TiO(OH)<sub>2</sub> particles were centrifuged and washed with ethanol several times and dried. Finally, as-prepared sample was annealed at 600 °C for 3 h under an air atmosphere to obtain highly crystalline ZnTiO<sub>3</sub> particles. SEM images and XRD patterns of ZTO particles are presented in Fig.S1.

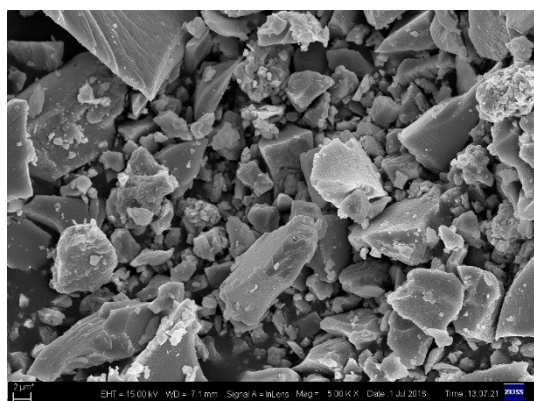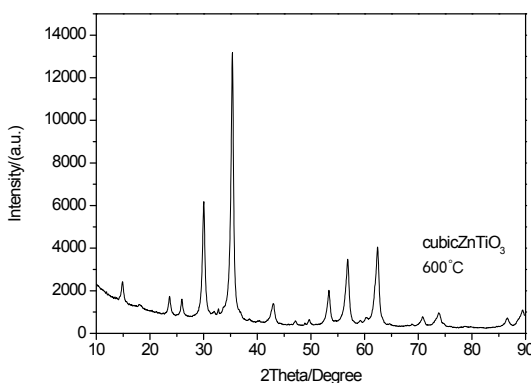

Fig. S1. SEM images and XRD patterns of ZTO particles (scale bar: 2  $\mu\text{m}$ )

## 2. Sample composition

The elemental mapping result of the ZTO and rGO/ZTO-2 sample was characterized by EDX spectrum shown in Fig. S2. It is observed from the spectra that characteristic peaks of Ti, Zn and O are available for both samples. The composition of both samples obtained in terms of atomic percent is listed in Table S1. The results reveal that the molar ratio of Ti to Zn is about 1:1 for both samples, which matches with the stoichiometric composition of the compound.

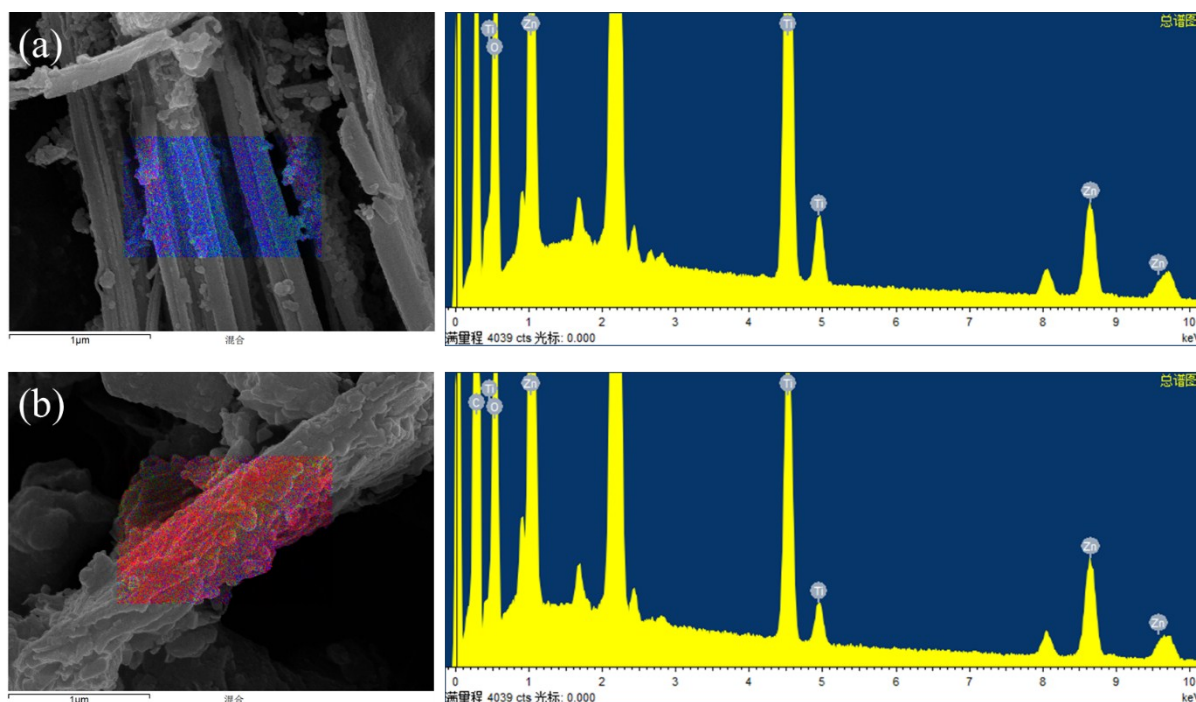

Fig. S2 EDX spectrum of a) ZTO and b) rGO/ZTO-2 rods

Table S1 Atomic composition of ZTO and rGO/ZTO-2 rods

| Elements | Atomic % (ZTO) | Atomic % (rGO/ZTO-2) |
|----------|----------------|----------------------|
| Zn       | 16.80          | 18.51                |
| Ti       | 18.95          | 18.91                |
| O        | 64.25          | 62.58                |
